# Supplementary material for: Tuning pseudocapacitive and battery-like lithium intercalation in vanadium dioxide/carbon onion hybrids for asymmetric supercapacitor anodes
Source: Royal Society of Chemistry journal article supplement (doi:10.1039/c7ta02564e), 2017-01-01
Supplement: c7ta02564e1.pdf [file c7ta02564e1.pdf]

**Electronic Supplementary Information**

**Tuning pseudocapacitive and battery-like lithium  
intercalation in vanadium dioxide/carbon onion  
hybrids for asymmetric supercapacitor anodes**

**Simon Fleischmann,<sup>1,2</sup> Marco Zeiger,<sup>1,2</sup> Nicolas Jäckel,<sup>1,2</sup> Benjamin Krüner,<sup>1,2</sup>**

**Valeria Lemkova,<sup>1,2</sup> Mathias Widmaier,<sup>2,3</sup> and Volker Presser<sup>1,2,\*</sup>**

<sup>1</sup> INM – Leibniz Institute for New Materials, 66123 Saarbrücken, Germany

<sup>2</sup> Department of Materials Science and Engineering, Saarland University, 66123 Saarbrücken, Germany

<sup>3</sup> Robert Bosch GmbH, 70049 Stuttgart, Germany

\* Corresponding author's eMail: [volker.presser@leibniz-inm.de](mailto:volker.presser@leibniz-inm.de)

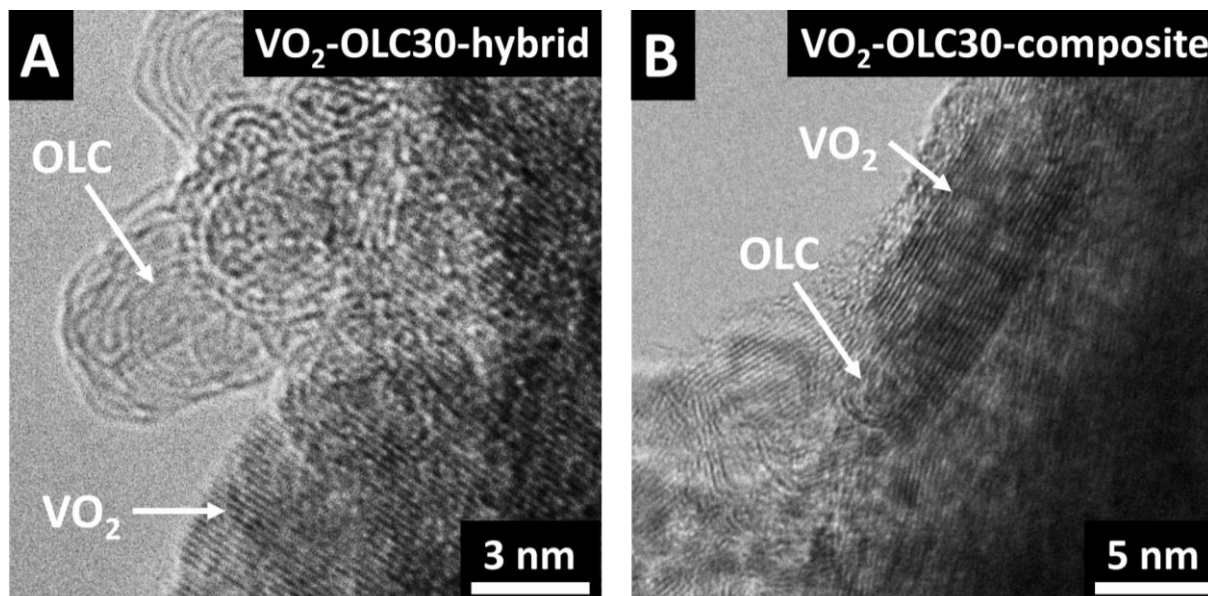

**Figure S1:** Transmission electron micrographs of (A) VO<sub>2</sub>-OLC30-hybrid and (B) VO<sub>2</sub>-OLC30-composite samples.

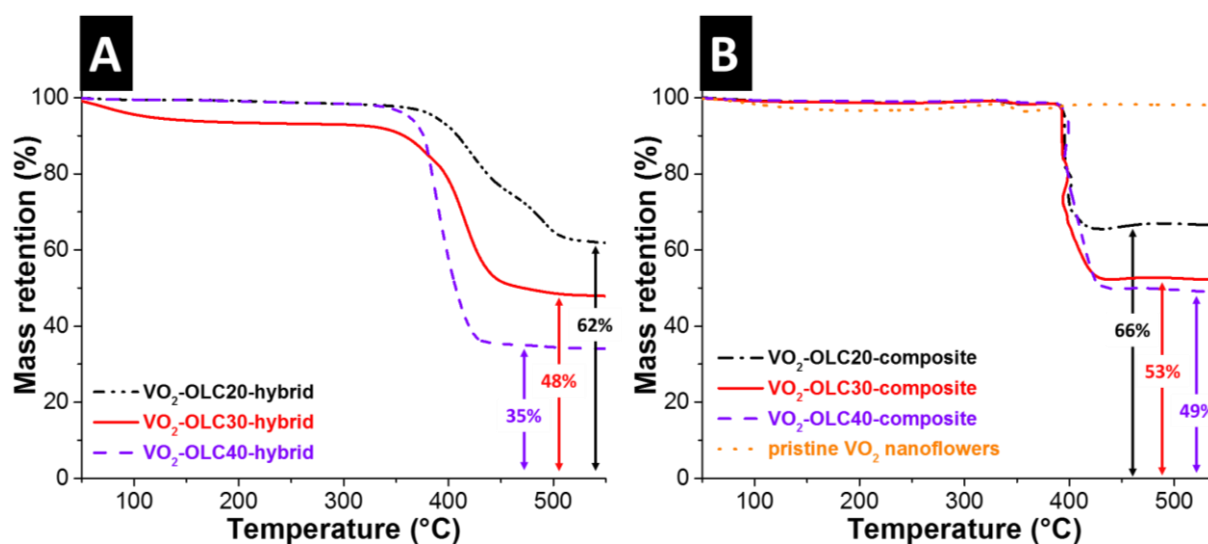

**Figure S2:** Thermogravimetric analysis of (A) VO<sub>2</sub>-OLC-hybrid samples and (B) VO<sub>2</sub>-OLC-composite samples and pristine VO<sub>2</sub> nanoflowers, carried out in synthetic air (flow rate of 20 mL·min<sup>-1</sup>) up to a temperature of 550 °C at a heating rate of 5 °C·min<sup>-1</sup>.

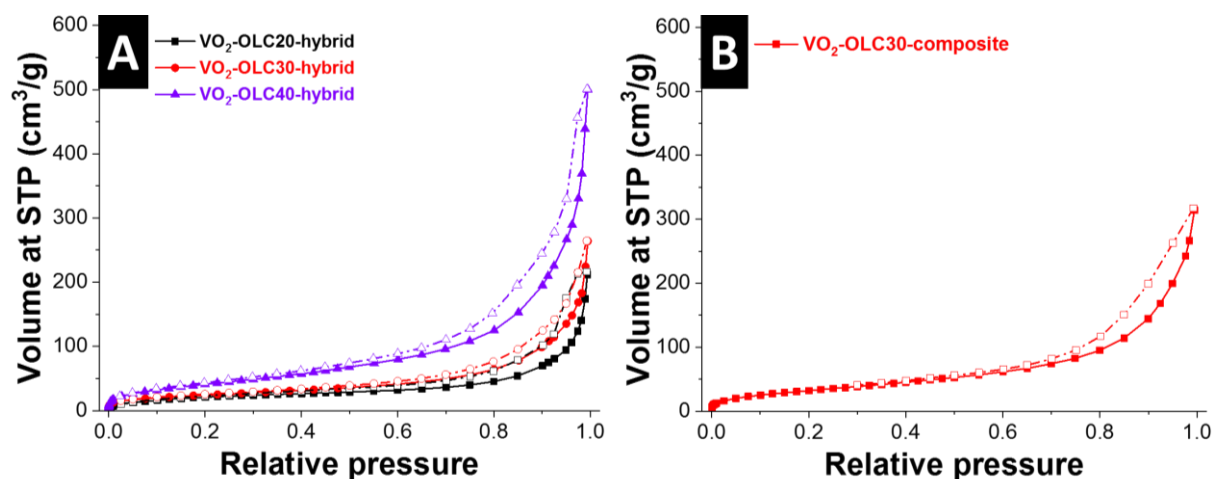

**Figure S3:** Nitrogen sorption isotherms at standard temperature and pressure of (A) VO<sub>2</sub>-OLC-hybrid samples and (B) VO<sub>2</sub>-OLC30-composite sample. The dashed lines correspond to the desorption branch.

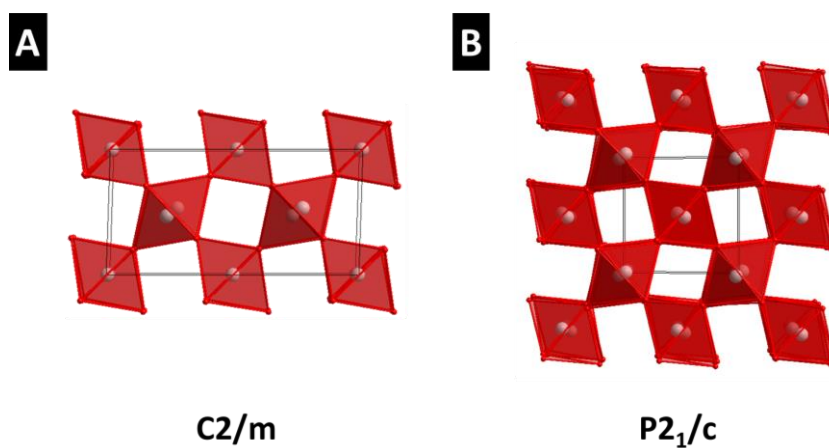

**Figure S4:** Crystal structures of the monoclinic VO<sub>2</sub> structure in (A) C2/m and (B) P2<sub>1</sub>/c space group. The vanadium atoms are represented by white spheres, oxygen atoms by red spheres. The distances between the shared oxygen atoms at the corners of the octahedra show a fixed distance of 3.3 Å for C2/m and a varying distance between 2.9 Å and 6.4 Å for P2<sub>1</sub>/c.

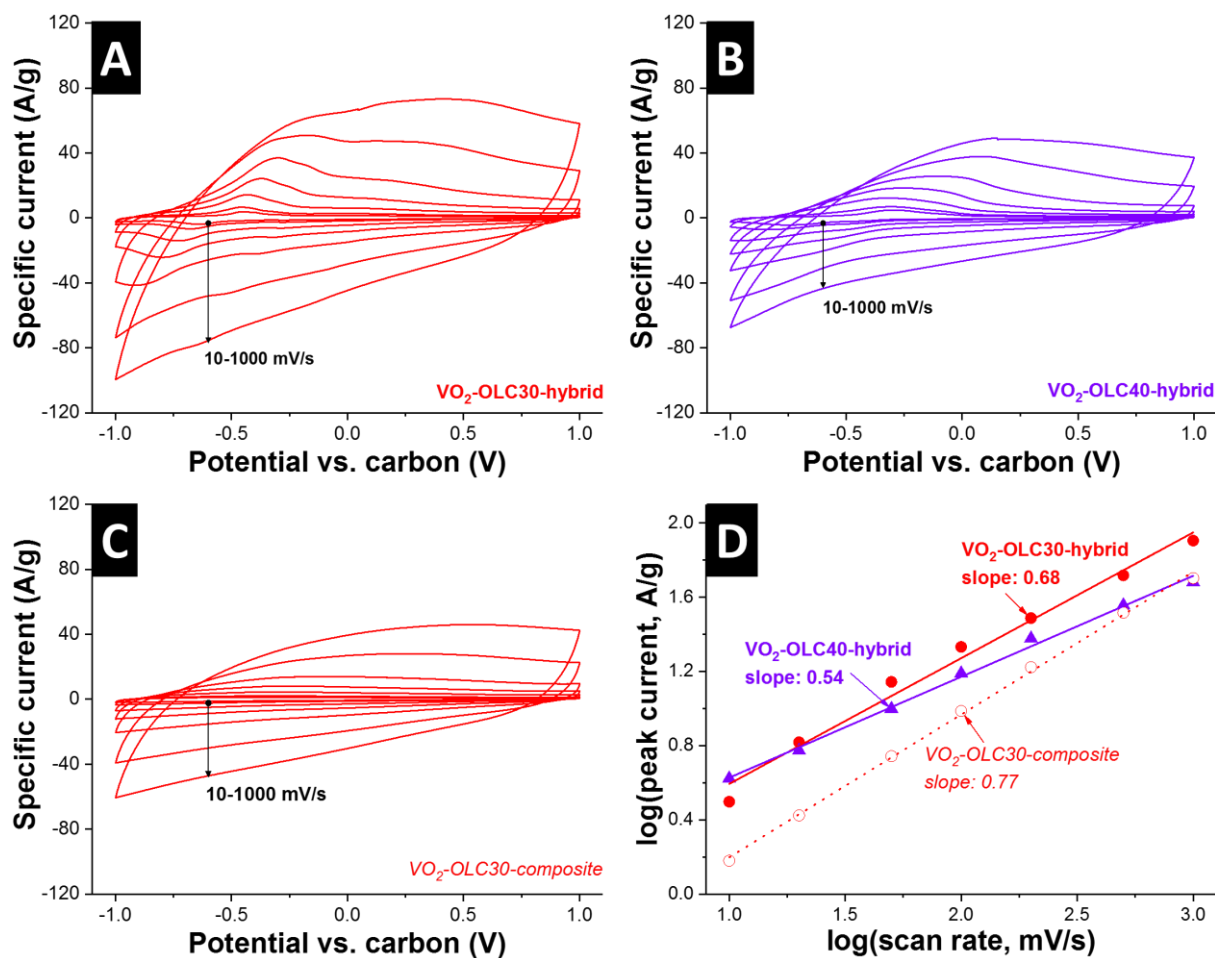

**Figure S5:** CVs of (A) VO<sub>2</sub>-OLC30-hybrid, (B) VO<sub>2</sub>-OLC40-hybrid, and (C) VO<sub>2</sub>-OLC30-composite samples measured in half-cells and varying scanning speeds of 10-1000 mV·s<sup>-1</sup>. (D) Kinetic analysis via logarithmic plotting of the peak current at -0.7 V vs. carbon against the scan rate and linear regression applied to the data points.

**Table S1:** Electrode conductivity of VO<sub>2</sub>-OLC30-hybrid and VO<sub>2</sub>-OLC30-composite electrodes by 4-point probe as an average of six measurements.

| Material                         | Electrode conductivity (S·cm <sup>-1</sup> ) |
|----------------------------------|----------------------------------------------|
| VO <sub>2</sub> -OLC30-hybrid    | 0.30 ± 0.03                                  |
| VO <sub>2</sub> -OLC30-composite | 0.16 ± 0.05                                  |

**Table S2:** Specific surface area (BET) and pore volume (at P/P<sub>0</sub>=0.95) of VO<sub>2</sub>-OLC samples and as synthesized vanadium oxide nanoflowers and carbon onions.

| Material                         | SSA (BET) (m <sup>2</sup> ·g <sup>-1</sup> ) | Pore volume (cm <sup>3</sup> ·g <sup>-1</sup> ) |
|----------------------------------|----------------------------------------------|-------------------------------------------------|
| VO <sub>2</sub> -OLC20-hybrid    | 81                                           | 0.15                                            |
| VO <sub>2</sub> -OLC30-hybrid    | 89                                           | 0.21                                            |
| VO <sub>2</sub> -OLC40-hybrid    | 160                                          | 0.41                                            |
| VO <sub>2</sub> -OLC30-composite | 118                                          | 0.31                                            |
| VO <sub>2</sub> as synthesized   | 38                                           | 0.04                                            |
| OLCs as synthesized              | 352                                          | 0.93                                            |

**Table S3:** Analysis of D- and G-bands of the samples VO<sub>2</sub>-OLC30-hybrid and VO<sub>2</sub>-OLC30-composite, calculated by peak deconvolution.

| Material                         | FWHM D (cm <sup>-1</sup> ) | FWHM G (cm <sup>-1</sup> ) | I <sub>D</sub> /I <sub>G</sub> | Pos. D-band (cm <sup>-1</sup> ) | Pos. G-band (cm <sup>-1</sup> ) |
|----------------------------------|----------------------------|----------------------------|--------------------------------|---------------------------------|---------------------------------|
| VO <sub>2</sub> -OLC30-hybrid    | 69                         | 48                         | 2.7                            | 1347                            | 1590                            |
| VO <sub>2</sub> -OLC30-composite | 58                         | 40                         | 2.3                            | 1347                            | 1587                            |
